# Supplementary material
Source: Springer Nature journal article supplement (https://www.springermedizin.de/resource/supplementary/12986_2010_271_MOESM3_ESM.pdf/25655726)

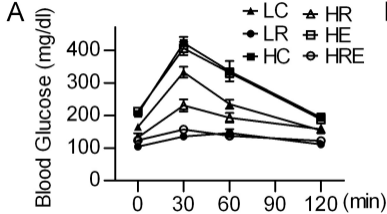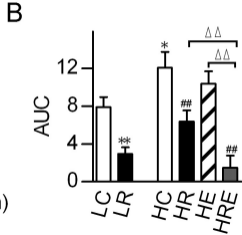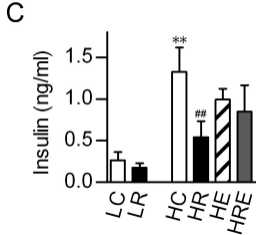

Supplement: MOESM3 [file 25655726]
